# Supplementary material
Source: PubMed Central journal article supplement (PMC2851762)
Supplement: 0910516107_pnas.0910516107_SI.pdf [file 0910516107_pnas.0910516107_SI.pdf]

# Supporting Information

Scaloni et al. 10.1073/pnas.0910516107

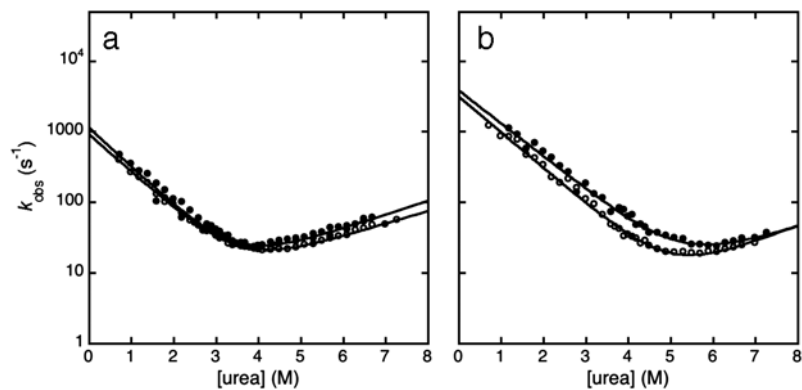

**Fig. S1.** Chevron plot of Cter-NPM1 with (Closed Circles) and without (Open Circles) the His6-tag. Kinetics measured in the absence (A) and in the presence (B) of 0.5 M NaCl. Calculated folding parameters revealed that folding was essentially unaffected by the presence of the tag.





**Table S2. Folding parameters of Cter-NPM1 and site directed mutants, measured at pH 7.0 and 283 K.**

|           | $k_F$ ( $s^{-1}$ ) | $m_F$ (kcal mol $^{-1}$ M $^{-1}$ ) | $k_U$ ( $s^{-1}$ ) | $m_U$ (kcal mol $^{-1}$ M $^{-1}$ ) | $T_m$ (K)   |
|-----------|--------------------|-------------------------------------|--------------------|-------------------------------------|-------------|
| Wild-type | 1100 ± 100         | 0.75 ± 0.03                         | 2.9 ± 0.6          | 0.27 ± 0.02                         | 336.5 ± 0.2 |
| V244A     | 900 ± 100          | 0.74 ± 0.05                         | 13 ± 2.0           | 0.29 ± 0.02                         | 330.4 ± 0.2 |
| E245A     | 1000 ± 90          | 0.66 ± 0.03                         | 2.7 ± 0.6          | 0.25 ± 0.02                         | 338.5 ± 0.1 |
| A245G     | 750 ± 100          | 0.66 ± 0.04                         | 5.4 ± 1.1          | 0.26 ± 0.02                         | 333.7 ± 0.2 |
| D246A     | 950 ± 90           | 0.68 ± 0.03                         | 3.4 ± 0.7          | 0.26 ± 0.02                         | 339.0 ± 0.2 |
| A246G     | 700 ± 70           | 0.67 ± 0.03                         | 4.5 ± 0.7          | 0.30 ± 0.02                         | 324.1 ± 0.2 |
| I247V     | 1000 ± 60          | 0.75 ± 0.03                         | 6.3 ± 0.8          | 0.25 ± 0.02                         | 327.4 ± 0.2 |
| K248A *   | -                  | -                                   | -                  | -                                   | -           |
| A248G *   | -                  | -                                   | -                  | -                                   | -           |
| A249G     | 550 ± 80           | 0.69 ± 0.06                         | 18 ± 2             | 0.19 ± 0.01                         | 322.5 ± 0.2 |
| K250A     | 1700 ± 150         | 0.64 ± 0.02                         | 1.5 ± 0.6          | 0.21 ± 0.04                         | 341.1 ± 0.2 |
| A250G     | 700 ± 60           | 0.36 ± 0.02                         | 4.4 ± 0.1          | 0.22 ± 0.08                         | 329.9 ± 0.1 |
| M251A *   | -                  | -                                   | -                  | -                                   | -           |
| A253G     | 600 ± 90           | 0.74 ± 0.07                         | 16 ± 2             | 0.25 ± 0.01                         | 321.0 ± 0.2 |
| I255V     | 700 ± 70           | 0.61 ± 0.04                         | 6.8 ± 1.6          | 0.20 ± 0.02                         | 326.1 ± 0.2 |
| L261A     | 1300 ± 300         | 0.69 ± 0.2                          | 110 ± 50           | 0.26 ± 0.08                         | 318.3 ± 0.4 |
| A266G     | 700 ± 100          | 0.77 ± 0.05                         | 4.2 ± 0.6          | 0.24 ± 0.01                         | 333.0 ± 0.1 |
| F268A *   | -                  | -                                   | -                  | -                                   | -           |
| I269V     | 700 ± 60           | 0.74 ± 0.03                         | 2.8 ± 0.5          | 0.26 ± 0.02                         | 335.4 ± 0.1 |
| N270A     | 1800 ± 150         | 0.62 ± 0.02                         | 2.2 ± 0.8          | 0.22 ± 0.03                         | 342.9 ± 0.2 |
| A270G     | 400 ± 40           | 0.70 ± 0.04                         | 2.9 ± 0.5          | 0.23 ± 0.02                         | 328.8 ± 0.1 |
| V272A     | 500 ± 70           | 0.93 ± 0.08                         | 11 ± 1             | 0.29 ± 0.01                         | 324.6 ± 0.2 |
| K273A     | 800 ± 80           | 0.73 ± 0.04                         | 7.9 ± 1.3          | 0.19 ± 0.02                         | 332.9 ± 0.1 |
| A273G     | 200 ± 30           | 0.75 ± 0.07                         | 8.8 ± 1.1          | 0.19 ± 0.01                         | 324.2 ± 0.2 |
| F276A *   | -                  | -                                   | -                  | -                                   | -           |
| A283G     | 500 ± 50           | 0.68 ± 0.04                         | 5.7 ± 1.1          | 0.20 ± 0.02                         | 326.7 ± 0.2 |
| I284V     | 900 ± 130          | 0.94 ± 0.06                         | 13.3 ± 1.4         | 0.18 ± 0.01                         | 322.8 ± 0.1 |
| L287A     | 900 ± 180          | 1.25 ± 0.5                          | 140 ± 20           | 0.33 ± 0.15                         | 318.0 ± 0.1 |
| W288F     | 600 ± 240          | 1.0 ± 0.3                           | 80 ± 9             | 0.14 ± 0.01                         | 310.5 ± 0.2 |
| W290F     | 360 ± 40           | 0.75 ± 0.1                          | 50 ± 4             | 0.16 ± 0.01                         | 321.6 ± 0.2 |
| K292A     | 1200 ± 100         | 0.71 ± 0.04                         | 10 ± 1.6           | 0.23 ± 0.01                         | 321.9 ± 0.8 |
| A292G     | 650 ± 100          | 0.76 ± 0.09                         | 32 ± 5             | 0.18 ± 0.02                         | 312.4 ± 0.8 |
| L294A     | 400 ± 80           | 0.50 ± 0.13                         | 50 ± 14            | 0.17 ± 0.03                         | 317.1 ± 0.8 |

\*These mutants expressed poorly and could not be characterized
